# Supplementary material for: Prominent roles of Ni(OH)2 deposited on ZnIn2S4 microspheres in efficient charge separation and photocatalytic H2 evolution
Source: Royal Society of Chemistry journal article supplement (doi:10.1039/d1ra01648b), 2021-01-01
Supplement: d1ra01648b1.pdf [file d1ra01648b1.pdf]

**Supplementary information for:**

**Prominent Roles of Ni(OH)<sub>2</sub> deposited on ZnIn<sub>2</sub>S<sub>4</sub> microspheres in efficient charge separation and photocatalytic H<sub>2</sub> evolution**

Zhuang Guo, Huixia Hou, Jingyi Zhang, Pinglong Cai and Jun Lin\*

*Department of Chemistry, Renmin University of China, Beijing 100872, People's Republic of China*

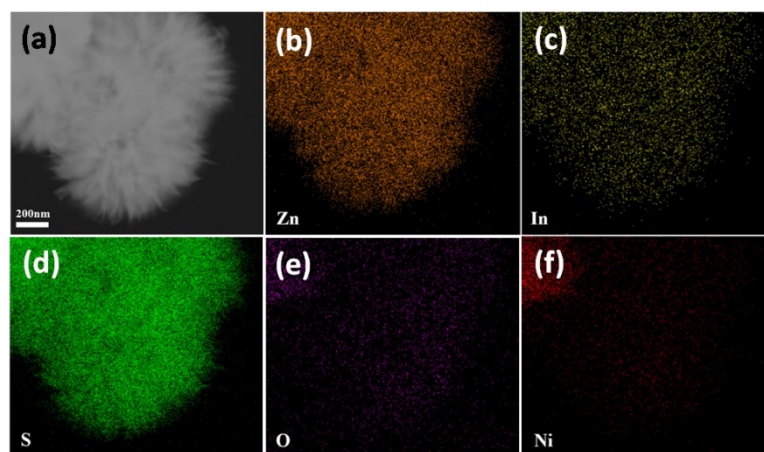

**Fig. S1** STEM image and EDS elemental mapping (b-f) of 6% Ni(OH)<sub>2</sub>/ZnIn<sub>2</sub>S<sub>4</sub>.

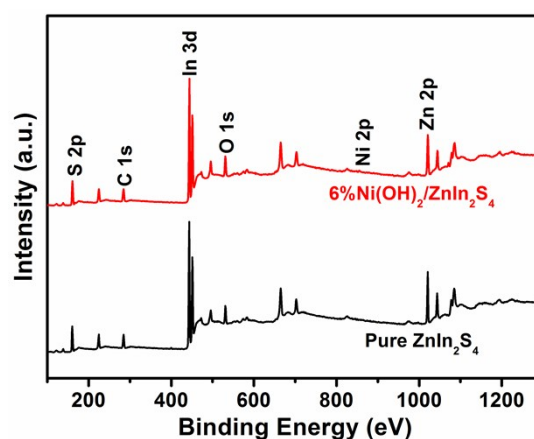

**Fig. S2** XPS survey spectra of pure ZnIn<sub>2</sub>S<sub>4</sub> and 6% Ni(OH)<sub>2</sub>/ZnIn<sub>2</sub>S<sub>4</sub>.
